# Supplementary material for: Theoretical study on the adsorption and electronic properties of toxic gas molecules on single-atom Pt-doped B/N-coordinated graphene
Source: Royal Society of Chemistry journal article supplement (doi:10.1039/d1nj03763c), 2021-01-01
Supplement: d1nj03763c1.pdf [file d1nj03763c1.pdf]

**Table S1.** Adsorption energies ( $E_{ads}$ ) for CO, NO and average  $E_{ads}$  for 2CO, 2NO on different graphene-Pt sheets by using the DFT-D2 calculations.

| Substrates   | DFT-D2               |                      |                       |                       |
|--------------|----------------------|----------------------|-----------------------|-----------------------|
|              | CO<br>$E_{ads}$ (eV) | NO<br>$E_{ads}$ (eV) | 2CO<br>$E_{ads}$ (eV) | 2NO<br>$E_{ads}$ (eV) |
| 1B-gra-Pt    | 0.97                 | 1.68                 | 0.91                  | 1.35                  |
| 2B-gra-Pt    | 1.21                 | 1.39                 | 0.85                  | 1.15                  |
| 3B-gra-Pt    | 0.94                 | 1.12                 | 0.69                  | 1.00                  |
| 1N-gra-Pt    | 1.30                 | 2.18                 | 1.39                  | 1.47                  |
| 2N-gra-Pt    | 2.37                 | 3.05                 | 1.80                  | 1.87                  |
| 3N-gra-Pt    | 3.09                 | 4.52                 | 1.97                  | 2.51                  |
| 1B-1N-gra-Pt | 1.68                 | 2.06                 | 0.86                  | 1.44                  |
| 1B-2N-gra-Pt | 2.42                 | 2.98                 | 1.40                  | 1.88                  |
| 2B-1N-gra-Pt | 1.02                 | 1.97                 | 0.88                  | 1.26                  |
| SV-gra-Pt    | 0.28                 | 1.25                 | 0.99                  | 1.39                  |

**Table S2.** The amounts of transfer charge ( $\Delta q, e$ ) from graphene-Pt substrates to CO, NO, 2CO or 2NO molecules.

| Substrates   | CO   | NO   | 2CO  | 2NO  |
|--------------|------|------|------|------|
| 1B-gra-Pt    | 0.24 | 0.40 | 0.21 | 0.49 |
| 2B-gra-Pt    | 0.14 | 0.36 | 0.19 | 0.40 |
| 3B-gra-Pt    | 0.15 | 0.36 | 0.22 | 0.34 |
| 1N-gra-Pt    | 0.21 | 0.46 | 0.26 | 0.54 |
| 2N-gra-Pt    | 0.24 | 0.45 | 0.25 | 0.55 |
| 3N-gra-Pt    | 0.30 | 0.47 | 0.31 | 0.60 |
| 1B-1N-gra-Pt | 0.21 | 0.42 | 0.20 | 0.56 |
| 1B-2N-gra-Pt | 0.24 | 0.42 | 0.28 | 0.62 |
| 2B-1N-gra-Pt | 0.24 | 0.36 | 0.21 | 0.50 |
| SV-gra-Pt    | 0.25 | 0.47 | 0.27 | 0.58 |

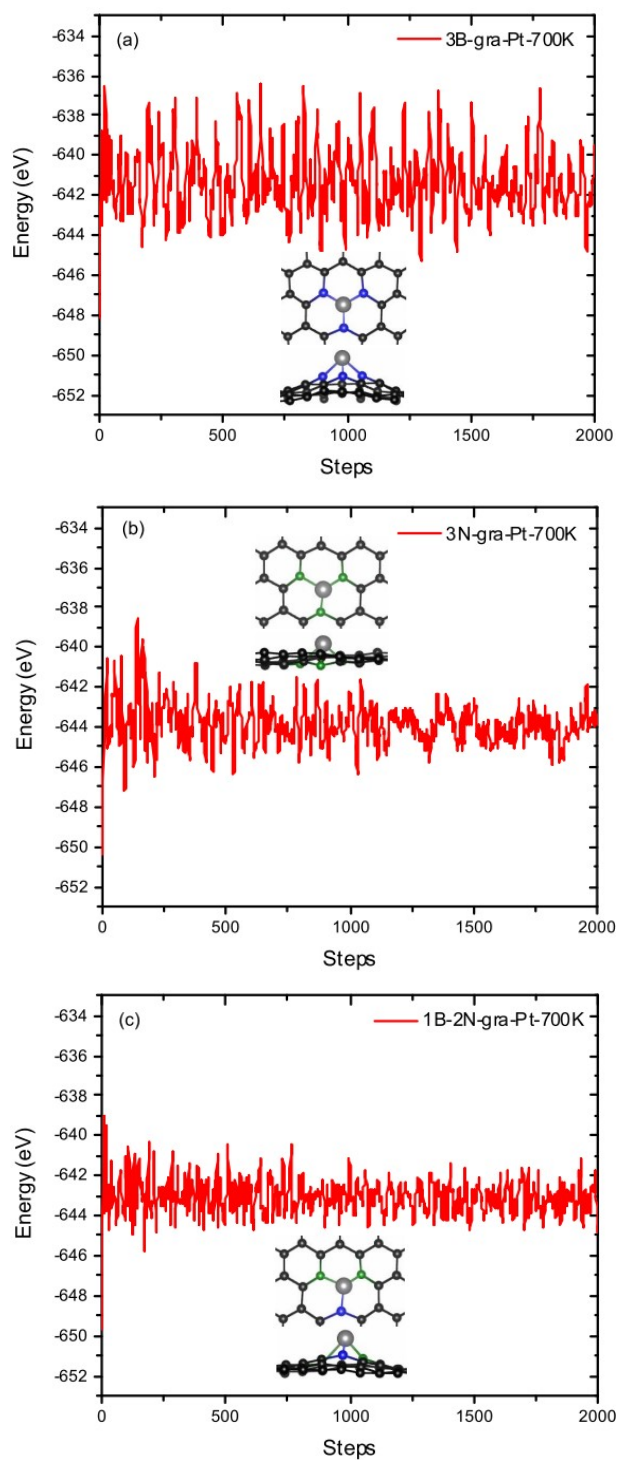

**Fig.S1.** Stable structures for (a) 3B-graphene-Pt, (b) 3N-graphene-Pt and (c) 1B-2N-graphene-Pt from the molecular dynamics simulation at 700 K.

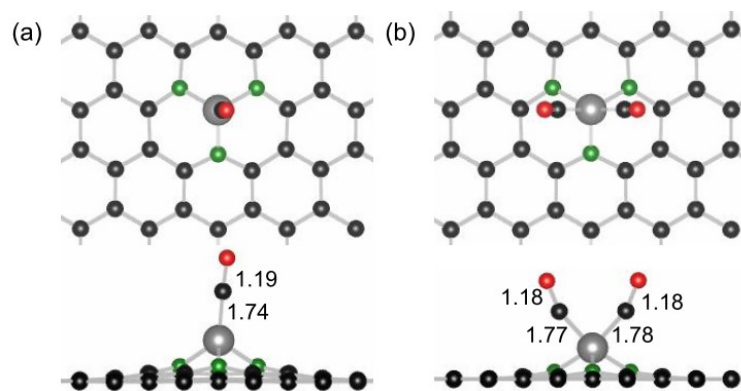

**Fig.S2.** Initial adsorption sites for (a) CO and (b) 2CO molecules anchored at 3N-graphene-Pt sheet.
